# Supplementary material for: Development of a community’s self-efficacy scale for preventing social isolation among community-dwelling older people (Mimamori Scale)
Source: PubMed Central journal article supplement (PMC5127097; doi:10.1186/s12889-016-3857-4), 2016-11-28
Supplement: 12889_2016_3857_MOESM1_ESM.pdf [file 12889_2016_3857_MOESM1_ESM.pdf]

## Appendix 1

### Community's Self-Efficacy Scale for Preventing Social Isolation among Community-dwelling Older People (CSES; *Mimamori* Scale)

|                                                        | Not confident at all                                                                                                 | Slightly unconfident | Slightly confident | Completely confident |   |
|--------------------------------------------------------|----------------------------------------------------------------------------------------------------------------------|----------------------|--------------------|----------------------|---|
| <b>Community Network (Total Possible Score: 0–12)</b>  |                                                                                                                      |                      |                    |                      |   |
| Q1                                                     | I can participate in the activities or volunteer work of my neighborhood association.                                | 0                    | 1                  | 2                    | 3 |
| Q2                                                     | I can create an environment where my neighbors can comfortably gather.                                               | 0                    | 1                  | 2                    | 3 |
| Q3                                                     | I can encourage nearby neighbors to come out to gatherings.                                                          | 0                    | 1                  | 2                    | 3 |
| Q4                                                     | I can discuss my concerns about residents at neighborhood gatherings or community meetings held by local government. | 0                    | 1                  | 2                    | 3 |
| <b>Neighborhood Watch (Total Possible Score: 0–12)</b> |                                                                                                                      |                      |                    |                      |   |
| Q5                                                     | I can check on older neighbors if I do not see them for a few days.                                                  | 0                    | 1                  | 2                    | 3 |
| Q6                                                     | I can help older neighbors with grocery shopping, garbage disposal, and other chores.                                | 0                    | 1                  | 2                    | 3 |
| Q7                                                     | I can check on neighborhood households where there are no signs of activity there.                                   | 0                    | 1                  | 2                    | 3 |
| Q8                                                     | When I notice a person I do not know in the neighborhood, I can speak to them.                                       | 0                    | 1                  | 2                    | 3 |
| <b>(Total Possible Scores: 0–24)</b>                   |                                                                                                                      |                      |                    |                      |   |

Tadaka E., et al.:Development of a Community's Self-Efficacy Scale for Preventing Social Isolation among Community-dwelling Older People (*Mimamori* Scale), BMC Public Health. 2016
