# Supplementary material for: Development of a community’s self-efficacy scale for preventing social isolation among community-dwelling older people (Mimamori Scale)
Source: BMC Public Health. 2016 Nov 28;16:1198. doi: 10.1186/s12889-016-3857-4 (PMC5127097; doi:10.1186/s12889-016-3857-4)
Supplement: Additional file 2: — Appendix 2: Japanese version of the final CSES. (PDF 254 kb) [file 12889_2016_3857_MOESM2_ESM.pdf]

## Appendix 2

### Community's Self-Efficacy Scale for Preventing Social Isolation among Community-dwelling Older People (CSES, *Mimamori* Scale) (地域見守り自己効力感尺度日本語版)

|                                |                                               | 全く<br>自信がない | あまり<br>自信がない | やや<br>自信がある | 大変<br>自信がある |
|--------------------------------|-----------------------------------------------|-------------|--------------|-------------|-------------|
| <b>‘コミュニティネットワーク’ (0-12 点)</b> |                                               |             |              |             |             |
| Q1                             | 近所の人気が楽に集まる場をつ<br>くることができる。                   | 0           | 1            | 2           | 3           |
| Q2                             | 周囲の住民に近所の集まりにで<br>るように誘うことができる。               | 0           | 1            | 2           | 3           |
| Q3                             | 町内会（自治会）の活動、奉仕<br>活動などに参加することができる。            | 0           | 1            | 2           | 3           |
| Q4                             | 気になる住民のことを町内会<br>（自治会）や役所等の会議で話<br>し合うことができる。 | 0           | 1            | 2           | 3           |
| <b>‘近隣見守り’ (0-12 点)</b>        |                                               |             |              |             |             |
| Q5                             | 隣近所の高齢者の顔を二、三日<br>見ないときは声をかけることが<br>できる。      | 0           | 1            | 2           | 3           |
| Q6                             | 隣近所の高齢者の買い物やごみ<br>出しなどを手助けすることができる。           | 0           | 1            | 2           | 3           |
| Q7                             | 物音や人の気配が全くしない隣<br>近所の家は様子を確認すること<br>ができる。     | 0           | 1            | 2           | 3           |
| Q8                             | 隣近所で見知らぬ人を見かけた<br>ら、一声かけることができる。              | 0           | 1            | 2           | 3           |
| <b>合計 (0-24 点)</b>             |                                               |             |              |             |             |

Tadaka E., et al.:Development of a Community's Self-Efficacy Scale for Preventing Social Isolation among Community-dwelling Older People (*Mimamori* Scale), BMC Public Health. 2016
